# Supplementary material for: Cocrystal engineering of molecular rearrangement: a “turn-on” approach for high-performance N-type organic semiconductors
Source: Royal Society of Chemistry journal article supplement (doi:10.1039/d1tc01441b), 2021-01-01
Supplement: d1tc01441b1.pdf [file d1tc01441b1.pdf]

## Supporting Information

### **Cocrystal Engineering of Molecular Rearrangement: A “Turn-On” Approach for High-Performance N-type Organic Semiconductor**

*Wei Wang,<sup>‡a</sup> Lixing Luo,<sup>‡a</sup> Zongqiong Lin,<sup>be</sup> Zifeng Mu,<sup>a</sup> Zhengkun Ju,<sup>a</sup> Bo Yang,<sup>a</sup> Yang Li,<sup>c</sup> Menglu Lin,<sup>d</sup> Guankui Long,<sup>d</sup> Jing Zhang,<sup>\*a</sup> Jianfeng Zhao,<sup>\*b</sup> and Wei Huang<sup>abe</sup>*

<sup>a</sup> Key Laboratory for Organic Electronics and Information Displays & Jiangsu Key Laboratory for Biosensors, Institute of Advanced Materials (IAM), Nanjing University of Posts & Telecommunications, 9 Wenyuan Road, Nanjing 210023, China.  
E-mail: [iamjingzhang@njupt.edu.cn](mailto:iamjingzhang@njupt.edu.cn)

<sup>b</sup> Key Laboratory of Flexible Electronics (KLOFE) & Institute of Advanced Materials (IAM), Nanjing Tech University (NanjingTech), 30 South Puzhu Road, Nanjing 211816, China.  
E-mail: [iamjfzhao@njtech.edu.cn](mailto:iamjfzhao@njtech.edu.cn)

<sup>c</sup> Jiangsu Key Laboratory of Micro and Nano Heat Fluid Flow Technology and Energy Application, School of Physical Science and Technology, Suzhou University of Science and Technology, Suzhou 215009, China.

<sup>d</sup> School of Materials Science and Engineering, National Institute for Advanced Materials, Nankai University, 300350, Tianjin, China.

<sup>e</sup> Frontiers Science Center for Flexible Electronics (FSCFE), MIIT Key Laboratory of Flexible Electronics (KLOFE), Shaanxi Key Laboratory of Flexible Electronics, Xi'an Key Laboratory of Flexible Electronics, Xi'an Key Laboratory of Biomedical Materials & Engineering, Xi'an Institute of Flexible Electronics, Institute of Flexible Electronics (IFE), Northwestern Polytechnical University, Xi'an 710072, Shaanxi, China.

## Experimental Procedures

**Materials:** Perylene were purchased from Luminescence Technology Corp. TCAF was synthesized as follows: first, di-cyanodiazafuorene (DCAF) was synthesized from the cyclo-condensation between 1Hindene-1,2,3-trione and 2,3-diaminomaleonitrile (DAMN) with a high yield of 85.0%; then TCAF was obtained from the atom-economical Knoevenagel condensation between DCAF and malononitrile with an excellent 91.5% yield.<sup>1</sup> Chlorobenzene (C<sub>6</sub>H<sub>5</sub>Cl, HPLC) were purchased from Sigma-Aldrich, and used directly as received without further purification.

**Cocrystal Growth and Structural Analysis:** For the growth of  $\alpha$ - and  $\beta$ -phase single crystal, equimolar amounts of TCAF (0.5 mg) and perylene (0.5 mg) were dissolved in chlorobenzene (2 mL) for the growth of  $\alpha$ - and  $\beta$ -phase single crystal. In order to ensure that the solution was completely dissolved, put the solution into sample heater with setting temperature 120 °C for 4 hours. The black crystals ( $\alpha$ -cocrystal) were obtained by room-temperature solution cooling for 12 hours and without any vibrations. While for the growth of  $\beta$ -cocrystal, as dark needle-like complexes, the dissolved solution was shaken vigorously and then placed on a flat workbench. The crystals were then found on the bottom of the bottle in 5-7 min. The Bruker Smart-1000-CCD diffractometer using graphite monochromatic Mo K $\alpha$  radiation ( $\lambda = 0.71073 \text{ \AA}$ ) measured the crystal structures of  $\alpha$ - and  $\beta$ -cocrystals. The data were collected at room temperature and the structure was resolved by the direct method and refined by the full-matrix least-squares method on  $F^2$  using the SHELXL-97 program,<sup>2</sup> and analyzed using Mercury and Diamond. CCDC number: 2047151 ( $\alpha$ -cocrystal), 2047153 ( $\beta$ -cocrystal). These crystallographic data can be obtained free of charge from The Cambridge Crystallographic Data Centre via [www.ccdc.cam.ac.uk/data\\_request/cif](http://www.ccdc.cam.ac.uk/data_request/cif).

**Growth of the Micro/nanocrystals and Device Fabrication:** Organic field-effect transistors (OFETs) with a top-contact/bottom-gate configuration were constructed to investigate the electric properties. Here, highly n-doped Si wafers were employed as the gate electrode, with 500 nm thermally oxidized SiO<sub>2</sub> as the gate dielectric (the capacitance is 7.5 nF·cm<sup>-2</sup>). The substrates used in the present study were successively cleaned with deionized water, hot acid/hydrogen peroxide solution (H<sub>2</sub>SO<sub>4</sub>:H<sub>2</sub>O<sub>2</sub> 2:1), and isopropyl alcohol, then blow dried by a N<sub>2</sub> gun. Si/SiO<sub>2</sub> wafers are treated with OTS by vapor deposition method to obtain a hydrophobic surface. For eliminating the effect of moisture, dry the silicon wafer under vacuum environment with setting temperature 90 °C for 75 min after cleaning. Until the silicon wafer was cooled to room temperature, took one drop of OTS on a glass dish and heat it to 120 °C for 135 minutes under vacuum environment. After natural cooling, the OTS modified wafers were washed with n-hexane, chloroform and isopropyl alcohol, dried under ambient N<sub>2</sub> before use. Afterwards 80  $\mu$ L chlorobenzene solution of perylene/TCAF mixture (0.5 mg/mL, molar ratio 1:1) were drop-cast onto 1  $\times$  1 cm<sup>2</sup> substrates in a nitrogen-filled glove box at room temperature; after the solvent evaporation,  $\alpha$ -phase cocrystals were obtained on the substrates. For phase change, we tried to drop hot chlorobenzene solvent onto the substrate containing  $\alpha$ -phase crystals for dissolution and regrowth. The  $\beta$ -cocrystals were obtained through several times of such re-drop-casting process. Drain and source electrodes (50 nm) were deposited on the single crystal by thermal evaporation with copper grid as a mask. Finally, the copper grid was removed to obtain a gap between the source and drain electrodes.

**Measurements:** The UV-vis-NIR absorption spectra were recorded by a LAMBDA 35 spectrometer. FT-IR spectra were recorded on a PE-Spectrum Two spectrometer with KBr slice under ambient atmosphere. X-ray diffraction (XRD) was carried out on a D/max2500 with a Cu K $\alpha$  source ( $\lambda = 1.541 \text{ \AA}$ ), the data were collected in the  $2\theta$  range of 3-30° at room temperature. The current-voltage ( $I$ - $V$ ) characteristics of the OFETs were recorded using a Keithley 4200 SCS and a Micromanipulator probe station with a high-resolution microscope in the ambient

condition. The charge carrier motilities were extracted from the saturated regime according to the following equation (1):

$$I_D = \frac{W}{2L} C_i \mu (V_{GS} - V_T)^2 \quad (1)$$

where  $I_D$  is the drain current,  $W$  and  $L$  are the channel width and length, respectively,  $C_i$  is the dielectric capacitance per unit area,  $\mu$  is the field-effect charge carrier mobility,  $V_{GS}$  and  $V_T$  is the gate-source voltage and threshold voltage.

**Theoretical calculation:** The calculations of the molecular energy levels were calculated by DFT at the B3LYP/6-31G level. The calculation of DCT was performed with the Mulliken population analysis. The crystal structures of the two perylene-TCAF complexes were optimized by using VASP 5.4 (Vienna Ab initio Simulation Package) program within the Perdew-Burke-Ernzerhof (PBE) functional<sup>3-5</sup>. The reciprocal space was covered by a  $\Gamma$ -centered Monkhorst-Pack lattice of  $3 \times 3 \times 3$   $K$ -points. The convergence criteria of the total energy and ionic force were set as  $10^{-5}$  eV and  $0.001 \text{ eV \AA}^{-1}$  for the geometry optimization, respectively. The effective transfer integral of the two cocrystals was calculated using the molecular-fragment orbit approach in combined with the basis set orthogonalization method. The super-exchange coupling along the donor-accept stacking direction,  $t^{\text{eff}}$  are estimated with the energy-splitting method by performed with Gaussian 09 at level of B3LYP/6-31G.

$$t^{\text{eff}} = (E_{L+1} - E_L)/2$$

Where  $E_L$  and  $E_{L+1}$  refer to the LUMO+1 and LUMO of the neutral state of the A-D-A triad.

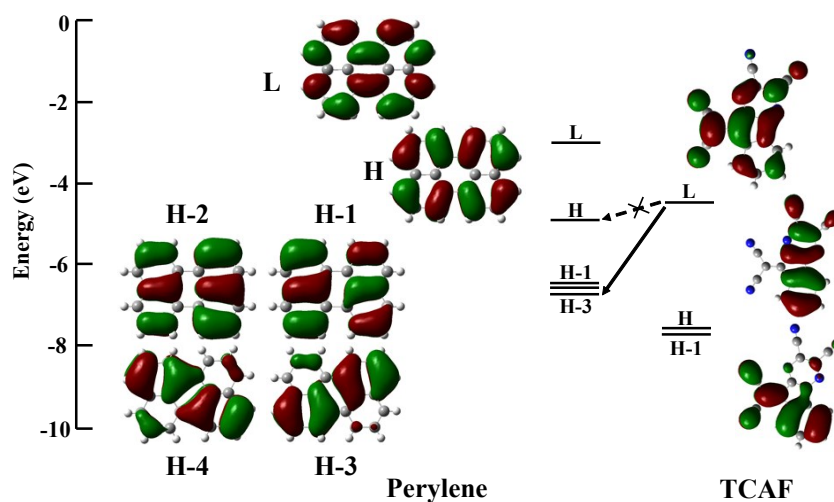

**Fig. S1.** Molecular orbitals of perylene and TCAF. The TCAF LUMO has a stripe symmetry, but the perylene HOMO has a horizontal node, so the charge carrier integrals calculated are opposite to cancel out hole transport. By contrast, the D HOMO-3 has a similar stripe symmetry, which causes the efficient electron transport.

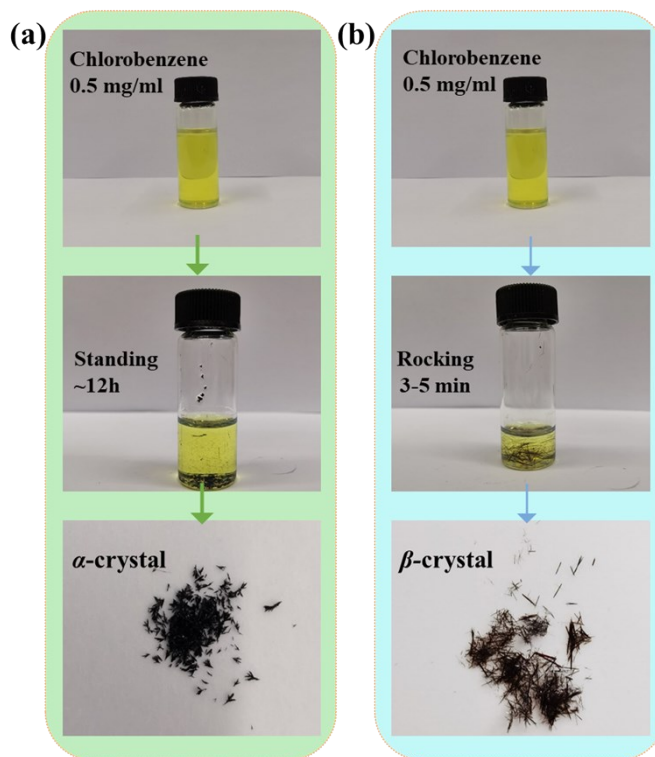

**Fig. S2.** Selective growth of (a)  $\alpha$ - and (b)  $\beta$ -phase complexes.

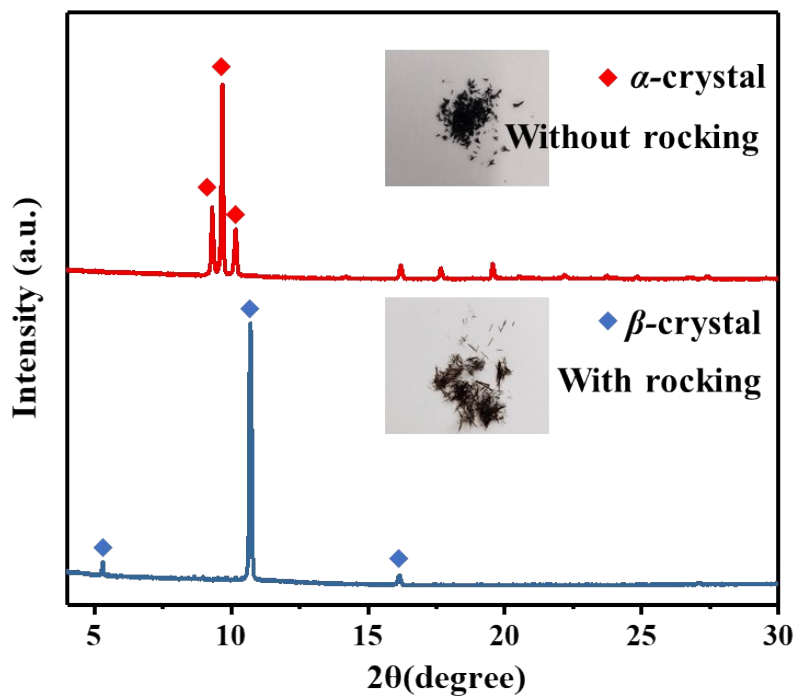

**Fig. S3.** The XRD peaks of (a)  $\alpha$ -phase and (b)  $\beta$ -phase complexes. Inserts are  $\alpha$ - and  $\beta$ -phase cocrystals.

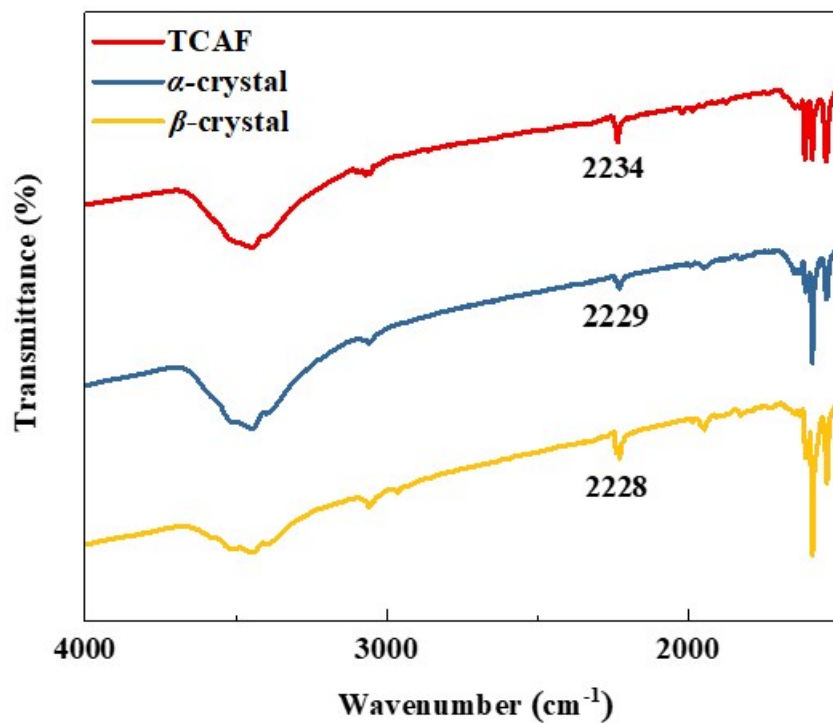

**Fig. S4.** FT-IR spectra of  $\alpha$ -,  $\beta$ -phase cocrystal and TCAF compound powders.

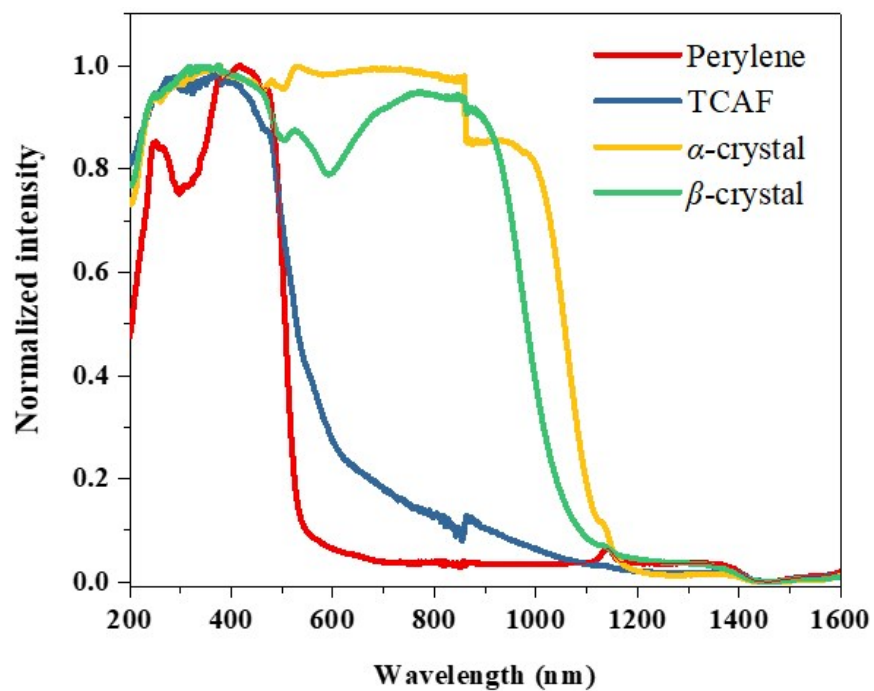

**Fig. S5.** Solid-state UV-vis absorption spectra of pristine perylene, TCAF and two phase complexes.

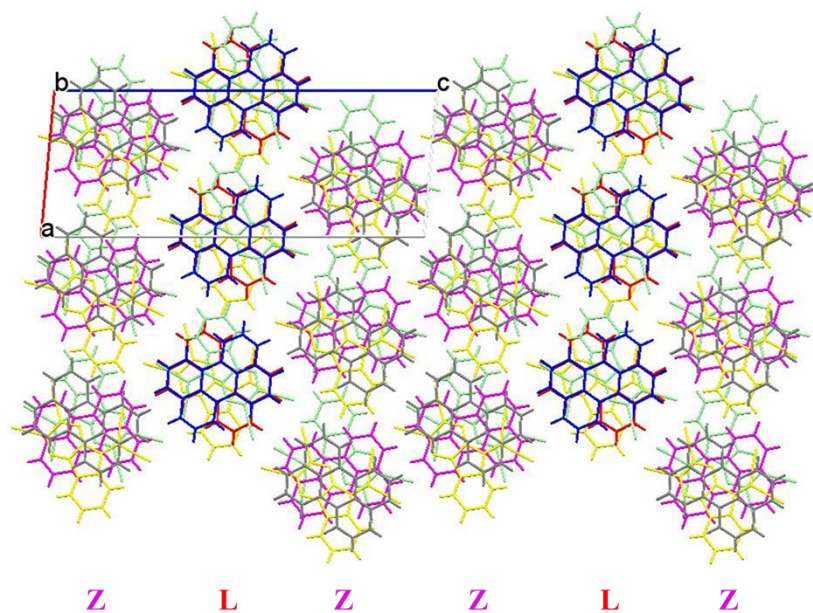

**Fig. S6.** Two alignment columns at a molar ratio of 2:1. Z represents Zig-zag mixed stacking, L represents typical mixed alignments.

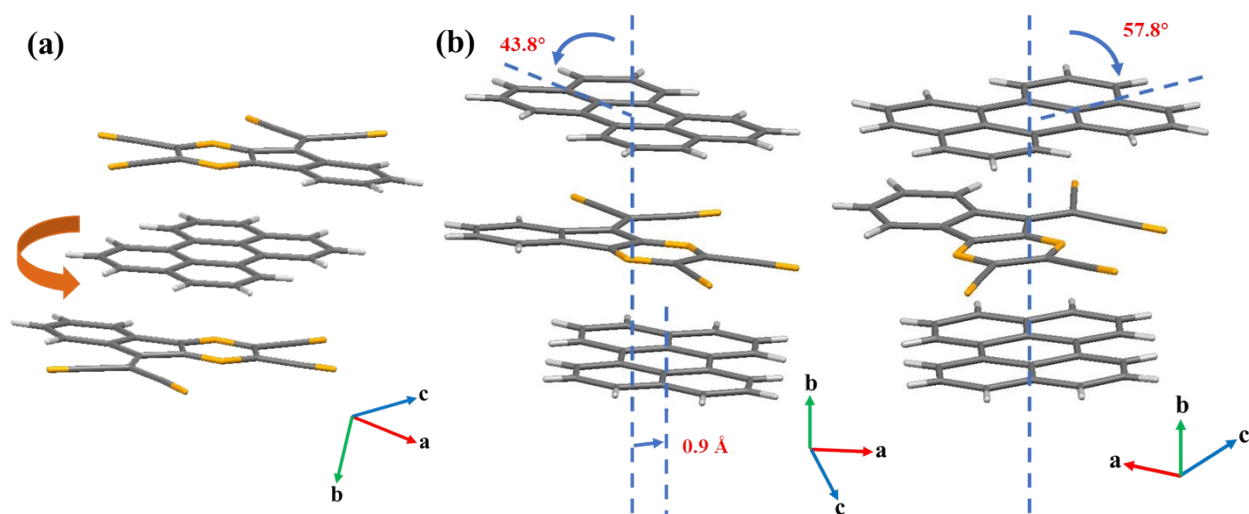

**Fig. S7.** Crystal stacking pattern of  $\alpha$ -phase cocrystal: (a) A-D-A and (b) D-A-D.

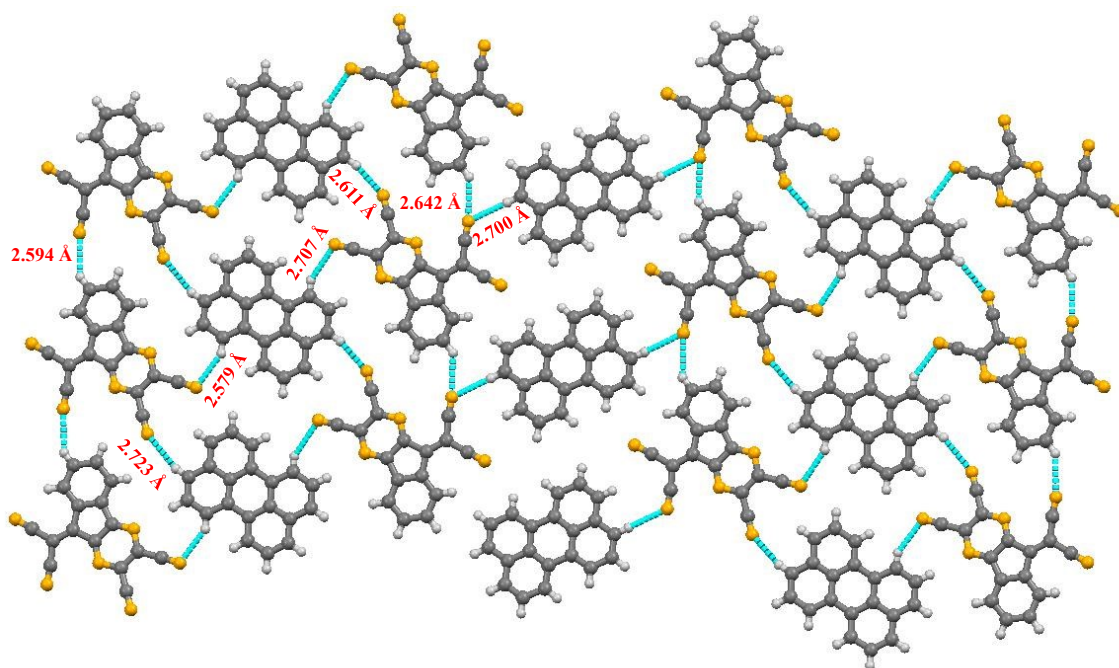

**Fig. S8.** The hydrogen bonding interactions in  $\alpha$ -phase cocrystal. Each TCAF molecule is surrounded by three perylene molecules and two TCAF molecules in  $ac$  plane. The extended  $\pi$ -conjugated system of TCAF led to C-H $\cdots$ N contacts (2.594 and 2.642 Å) between adjacent acceptor molecules, short C-H $\cdots$ N distances (2.579-2.723 Å) were observed between TCAF and perylene molecules from neighboring columns.

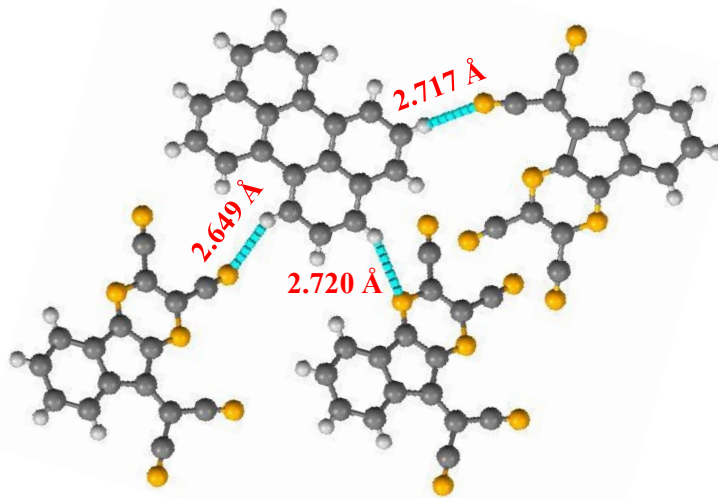

**Fig. S9.** The hydrogen bonds in the  $\beta$ -phase cocrystal. Each perylene molecule is surrounded by three TCAF molecules in  $ac$  plane. Perylene and TCAF in the neighboring columns were observed from the short C-H $\cdots$ N distance (2.649-2.720 Å).

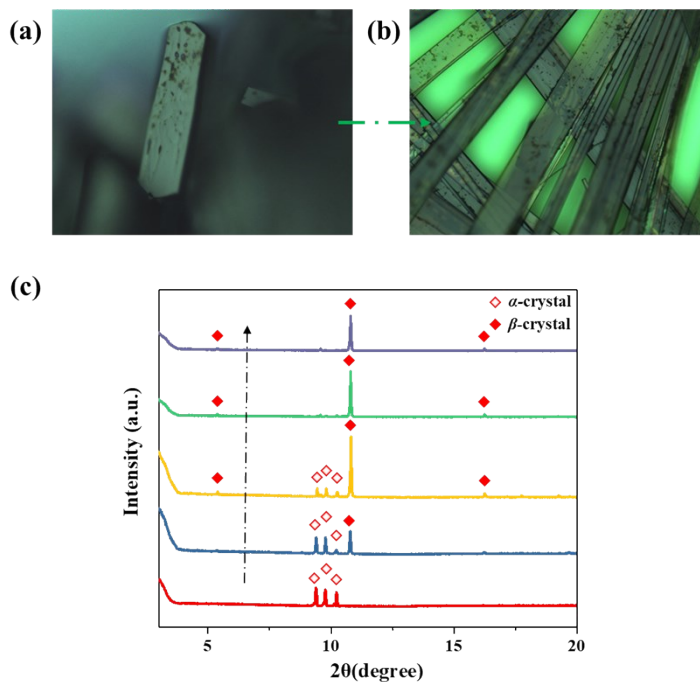

**Fig. S10.** Optical micrographs of (a)  $\alpha$ -phase microcrystals obtained via a solution drop-casting method and (b)  $\beta$ -phase microcrystals obtained through multi re-drop-casting processes. (c) Diffraction pattern changes of cocrystal transition from  $\alpha$ -phase to  $\beta$ -phase complex via gradual toluene dip-casting.



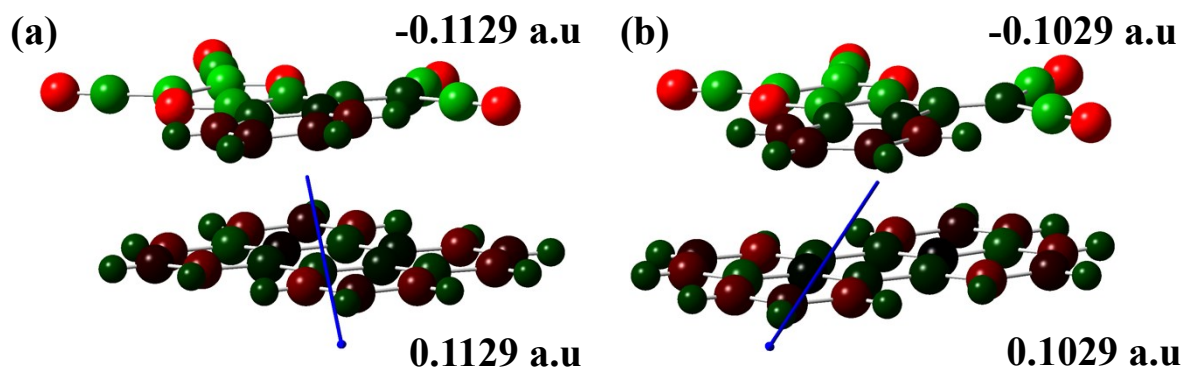

**Fig. S11.** The calculated mulliken charge distribution of (a)  $\alpha$ -crystal and (b)  $\beta$ -crystal at the DFT level with B3LYP/6-31G\*.

**Table S1.** Crystal data and structure refinement for  $\alpha$ -phase and  $\beta$ -phase cocrystals.

|                                                     | $\alpha$ -crystal                                                 | $\beta$ -crystal                                                  |
|-----------------------------------------------------|-------------------------------------------------------------------|-------------------------------------------------------------------|
| Empirical formula                                   | C <sub>36</sub> H <sub>16</sub> N <sub>6</sub>                    | C <sub>36</sub> H <sub>16</sub> N <sub>6</sub>                    |
| Formula weight                                      | 532.55                                                            | 532.55                                                            |
| Temperature (K)                                     | 296(2)                                                            | 297(2)                                                            |
| Wavelength (Å)                                      | 0.71073                                                           | 0.71073                                                           |
| Crystal system                                      | triclinic                                                         | monoclinic                                                        |
| Space group                                         | <i>P</i> -1                                                       | <i>P</i> 2 <sub>1</sub> / <i>c</i>                                |
| <b>Unit cell dimensions</b>                         |                                                                   |                                                                   |
| <i>a</i> (Å)                                        | 10.372(2)                                                         | 10.665(4)                                                         |
| <i>b</i> (Å)                                        | 13.686(3)                                                         | 7.297(3)                                                          |
| <i>c</i> (Å)                                        | 27.253(5)                                                         | 32.830(14)                                                        |
| $\alpha$ (°)                                        | 96.390(5)                                                         | 90                                                                |
| $\beta$ (°)                                         | 94.921(4)                                                         | 94.180(12)                                                        |
| $\gamma$ (°)                                        | 92.968(5)                                                         | 90                                                                |
| Volume (Å <sup>3</sup> )                            | 3823.0(13)                                                        | 2548.1(18)                                                        |
| <i>Z</i>                                            | 6                                                                 | 4                                                                 |
| Absorption coefficient (mm <sup>-1</sup> )          | 0.085                                                             | 0.085                                                             |
| Calculated density (g/cm <sup>3</sup> )             | 1.388                                                             | 1.388                                                             |
| <i>F</i> (000)                                      | 1644                                                              | 1096                                                              |
| Crystal size (mm)                                   | 0.180 × 0.150 × 0.130                                             | 0.220 × 0.210 × 0.200                                             |
| $\vartheta$ range (°)                               | 2.249 to 24.964                                                   | 2.206 to 24.999                                                   |
| Limiting indices                                    | -12 ≤ <i>h</i> ≤ 10<br>-16 ≤ <i>k</i> ≤ 16<br>-32 ≤ <i>l</i> ≤ 32 | -12 ≤ <i>h</i> ≤ 9<br>-8 ≤ <i>k</i> ≤ 8<br>-38 ≤ <i>l</i> ≤ 39    |
| Reflections collected                               | 23270                                                             | 14870                                                             |
| <i>R</i> (int)                                      | 0.0633                                                            | 0.1178                                                            |
| Absorption correction                               | Semi-empirical from equivalents                                   |                                                                   |
| Refinement method                                   | Full-matrix least-squares on <i>F</i> <sup>2</sup>                |                                                                   |
| Data / restraints / parameters                      | 12945/0/1136                                                      | 4469/0/379                                                        |
| Goodness-of-fit on <i>F</i> <sup>2</sup>            | 1.033                                                             | 1.007                                                             |
| Final <i>R</i> indices [ <i>I</i> > 2σ( <i>I</i> )] | <i>R</i> <sub>1</sub> = 0.0896<br><i>wR</i> <sub>2</sub> = 0.2195 | <i>R</i> <sub>1</sub> = 0.0886<br><i>wR</i> <sub>2</sub> = 0.1854 |
| <i>R</i> indices (all data)                         | <i>R</i> <sub>1</sub> = 0.1895<br><i>wR</i> <sub>2</sub> = 0.2508 | <i>R</i> <sub>1</sub> = 0.1951<br><i>wR</i> <sub>2</sub> = 0.2166 |

**Table S2.** The relative energy of the two perylene-TCAF complexes.

|                 | Energy (meV) | atoms | Energy (eV/atom) | Relative energy (meV/atom) |
|-----------------|--------------|-------|------------------|----------------------------|
| $\alpha$ -phase | -2575.2677   | 348   | -7.40            | 0.00                       |
| $\beta$ -phase  | -1714.6337   | 232   | -7.39            | 9.53                       |

## References

- 1 B. Yang, J. Zhao, Z. Wang, Z. Yang, Z. Lin, Y. Zhang, J. Li, L. Xie, Z. An, H. Zhang, J. Weng and W. Huang, *Chinese Chemical Letters*, 2019, **30**, 1969-1973.
- 2 G. M. Sheldrick, *SHELXL97, Program for the Refinement of Crystal Structure*, University of Göttingen, Germany, **1997**.
- 3 G. Kresse and J. Furthmüller, *Comput. Mater. Sci.*, 1996, **6**, 15-50.
- 4 G. Kresse, J. Hafner and *J. Phys.: Condens. Matter*, 1994, **6**, 8245–8257.
- 5 P. E. Blöchl, *Phys. Rev. B: Condens. Matter. Mater. Phys.*, 1994, **50**, 17953-17979.
